# Supplementary material for: Alpha-Fetoprotein- and CD40Ligand-Expressing Dendritic Cells for Immunotherapy of Hepatocellular Carcinoma
Source: MDPI journal article supplement (doi:10.3390/cancers13133375), 2021-07-05
Supplement: s1 [file s1]

## Supplementary Materials

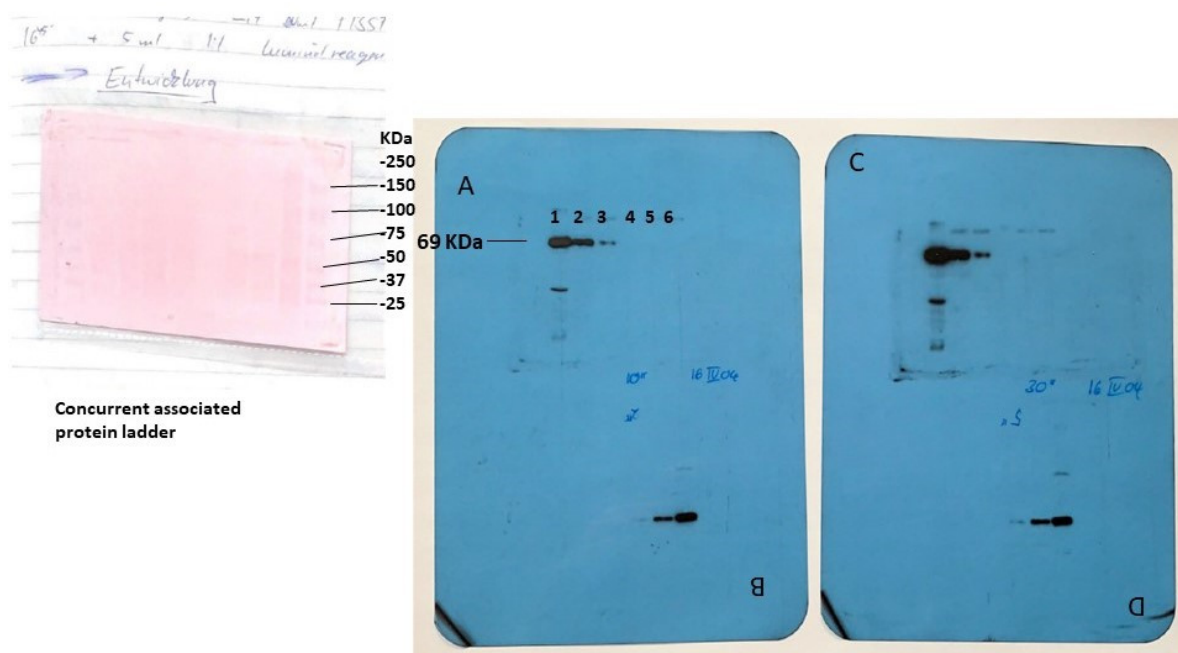

**Figure S1.** Western blots with different exposure times (A–D): 2", 5", 10", 30". For the manuscript we used the Western blot with 10 "exposure time (=A), the band at 69 KDa represents murine Alpha-Fetoprotein
